# Supplementary material for: Why are names of people associated with so many phonological retrieval failures?
Source: Springer Nature journal article supplement (doi:10.3758/s13423-011-0082-0), 2011-03-21
Supplement: MOESM1 [file 13423_2011_82_MOESM1_ESM.doc]

Pictures used in Experiment 1

Armadillo, Artichoke, Asparagus, Aubergine, Avocado, Beret, Bonzai Tree, Broccoli, Bugle, Butternut Squash, Corsage, Courgette, Dodo, Easel, Fennel, Fig, Foil, Ginger,

Guillotine, Hourglass, Hyena, Lynx, Mallet, Metronome, Monocle, Mushroom, Mute, Otter, Poinsettia, Porcupine, Puffin, Seal, Sitar, Scuttle, Tankard, Thimble, Topi, Treasury Tags, Walrus, Whistle

Alan Johnson, Ann Widdecombe, Audrey Hepburn, Barbara Streisand, Barbara Windsor, Bill Oddie, Billy Connolly, Bob Geldoff, Bob Marley, Cliff Richard, Daniella Westbrook, David Attenborough, David Bellamy, Doris Day, Fern Britton, Frank Sinatra, Glenda Jackson, Jack Straw, Jennifer Love Hewitt, John Major,Liza Minelli, Michael Caine, Michael Fish, Michael Jackson, Michael Parkinson, Mick Jagger, Neil Kinnock, Nick Ferrari, Paddy Ashdown, Paul McCartney,

Roger Moore, Ronnie Barker, Ronnie Corbett, Sarah Ferguson, Sarah Michelle Geller, Shania Twain, Tiger Woods, Trevor McDonald, Twiggy, Dick Van Dyke

Written materials used in Experiment 2.

*Abacus*: An instrument for performing calculations by sliding beads along rods and grooves.

*Anagram*: A word made by changing the order of the letters in another word.

*Cartographers*: What mapmakers are called.

*Escalator*: The moving staircase that can be found in most clothes shops.

*Filament*: The glowing wire inside a light bulb.

*Gargoyle*: The grotesques carved or sculpted figure projecting at the upper part of a building, usually from the roof gutter.

*Haiku*: The unrhymed verse form of Japanese origin having 3 lines of 5, 7 and 5 syllables.

*Insomnia*: The prolonged inability to obtain adequate sleep.

*Locust*: The name of the migratory grasshopper that travels in vast swarms and strips areas it passes of vegetation.

*Maraca:* A club-like gourd containing beads that is held in the hand and shaken as a musical instrument and usually comes in pairs.

*Onomatopoeia*: The formation of words in imitation of natural sounds.

*Origami*: The Japanese art of paper folding.

*Paediatrician*: A doctor who specialises in the treatment of children.

*Palindrome:* A sentence that reads the same forwards as backwards (e.g. Madam I'm Adam).

*Papyrus*: The Egyptian plant that is cut into strips and pressed into a material to write on.

*Perjury*: False statements while under oath.

*Plagiarism*: To steal another's work and pass it off as your own.

*Primogeniture*: A law that gives exclusive right of inheritance to the oldest son.

*Reincarnation:* To reappear or be reborn into another body after death.

*Tarot*: The deck of cards used for fortune telling.

*Thistle:* What is the name of the flower of Scotland?

*Trellis*: The latticed arrangement of wood strips in the garden used for climbing plants.

*Tsunami*: A tidal wave.

*Velcro*: Nylon fabric which has 2 pieces that stick to each other and is used as a fastener.

*Hans Christian Andersen:* Writer of "The Ugly Duckling".

*Mischa Barton:* The actress who used to play Marissa in the "OC".

*Alexander Graham Bell* : The inventor of the telephone.

*Alan Davies:* The actor who used to play"Jonathan Creek".

*Judi Dench*: The actress who is now a Dame and starred in "Shakespeare in love" and "Chocolat".

*Hugh Grant:* The actor whose first major film role was in "Remains of the day" and who became known as the partner of actress Elizabeth Hurley and starred in "4 weddings and a funeral".

*Melissa Joan Hart:* She acted in "Clarissa explains it all" and "Sabrina the teenage witch".

*Elton John:* The pop/rock star who has sold over 250 million records and had hits such as "Circle of life" and "Candle in the wind".

*Vernon Kay*: He married Tess Daly, the TV presenter.

*Chris Martin*: He is married to Gwynneth Paltrow.

*Steve McFadden:* He plays Phil Mitchell in "Eastenders"

*Marilyn Monroe:* The actress who starred in "Gentleman prefer blondes" and "There's no business like show business" and was an iconic American actress and model.

*Morrissey:* He was the lead singer in the Smiths.

*Michael Owen:* A current footballer who used to play for Real Madrid and currently for Newcastle.

*Isaac Newton*: He allegedly thought up the theory of gravity by having an apple fall on his head.

*Olivia Newton John:* She starred alongside John Travolta in "Grease".

*Katie Price:* The glamour model who used to be known as Jordan.

*Caroline Quentin:* The actress who starred in "Men behaving badly" and "Jonathan Creek".

*Daniel Radcliffe:* The actor who plays Harry Potter.

*Jonathan Ross*: The English television and radio presenter and film critic who presents his own talk show.

*Phillip Schofield:* Presenter of "This morning "on ITV with Fern Britton.

*Arnold Schwarzenegger:* The Governor of California and an actor.

*Mike Skinner:* Who is "The Streets".

*Phil Tufnell:* He used to be a cricketer and won "I'm a celebrity, get me out of here".
